# Supplementary material for: Antisense Transcription in Loci Associated to Hereditary Neurodegenerative Diseases
Source: PubMed Central journal article supplement (PMC6614138; doi:10.1007/s12035-018-1465-2), 2019-01-04
Supplement: 12035_2018_1465_MOESM2_ESM.pdf [file 12035_2018_1465_MOESM2_ESM.pdf]

## **Antisense transcription in *loci* associated to hereditary neurodegenerative diseases**

Silvia Zucchelli<sup>1,2</sup>, Stefania Fedele<sup>1</sup>, Paolo Vatta<sup>1,3</sup>, Raffaella Calligaris<sup>1,4</sup>, Peter Heutink<sup>5,6,7,8</sup>, Patrizia Rizzu<sup>5,9</sup>, Masayoshi Itoh<sup>7,8,10</sup>, Francesca Persichetti<sup>2</sup>, Claudio Santoro<sup>2</sup>, Hideya Kawaji<sup>7,8,10,11</sup>, Timo Lassmann<sup>7,8,12,13</sup>, Yoshihide Hayashizaki<sup>8,10</sup>, Piero Carninci<sup>7,8,14</sup>, Alistair R.R. Forrest<sup>7,8,15</sup>, the FANTOM Consortium and Stefano Gustincich<sup>1,3</sup>

|              | <b>Gene Name</b> | <b>TSS DPI Permissive</b> |
|--------------|------------------|---------------------------|
| AD           | <i>APP</i>       | 48                        |
| AD           | <i>PSEN1</i>     | 8                         |
| AD           | <i>PSEN2</i>     | 1                         |
| FTD          | <i>C9orf72</i>   | 14                        |
| FTD          | <i>GRN</i>       | 39                        |
| FTD          | <i>MAPT</i>      | 74                        |
| PD           | <i>SNCA</i>      | 20                        |
| PD           | <i>PRKN</i>      | 50                        |
| PD           | <i>PINK1</i>     | 22                        |
| PD           | <i>PARK7</i>     | 5                         |
| PD           | <i>LRRK2</i>     | 23                        |
| PD           | <i>VPS35</i>     | 33                        |
| ALS          | <i>SOD1</i>      | 11                        |
| ALS          | <i>FUS</i>       | 30                        |
| ALS          | <i>TARDBP</i>    | 4                         |
| ALS          | <i>UBQLN2</i>    | 10                        |
| HD           | <i>HTT</i>       | 11                        |
| <i>Total</i> |                  | <b>403</b>                |

**Supplementary Table S1.** Catalogue of FANTOM5 permissive promoters (TSS DPI permissive) in *loci* associated to hereditary neurodegenerative diseases. The TOTAL number of permissive promoters identified in this study is also shown (grey box). AD, Alzheimer's disease; FTD, Frontotemporal Dementia; PD, Parkinson's disease; ALS, Amyotrophic Lateral Sclerosis; HD, Huntington's disease.

| FANTOM CAT Annotated TRAITS |                         |                               |                           |                         |                          |                              |                        |                      |                              |
|-----------------------------|-------------------------|-------------------------------|---------------------------|-------------------------|--------------------------|------------------------------|------------------------|----------------------|------------------------------|
| Gene Name                   | AS lncRNA gene          | Trait#1                       | Trait#2                   | Trait#3                 | Trait#4                  | Trait#5                      | Trait#6                | Trait#7              | Trait#8                      |
| <i>APP</i>                  | <i>AP000230.1</i>       | Insulin resistance            | Type 2 diabetes           | Schizophrenia           |                          |                              |                        |                      |                              |
| <i>APP</i>                  | <i>CATG0000035739.1</i> | ND                            |                           |                         |                          |                              |                        |                      |                              |
| <i>PSEN1</i>                | <i>CATG0000021344.1</i> | ND                            |                           |                         |                          |                              |                        |                      |                              |
| <i>C9orf72</i>              | <i>CATG0000010512.1</i> | Amyotrophic Lateral Sclerosis | Prion Disease             | Inflammation            | Rheumatoid Arthritis     | Prostate Cancer              | Heart disease          | Abnormality of blood | Dementia                     |
| <i>MAPT</i>                 | <i>MAPT-AS1</i>         | Parkinson Disease             | Primary biliary cirrhosis | Alopecia                | Sickle Cell Trait        | Abnormality of RBC           | Type 2 diabetes        |                      |                              |
| <i>MAPT</i>                 | <i>CATG0000033807.1</i> | Parkinson Disease             | Primary biliary cirrhosis | Alopecia                | Sickle Cell Trait        | Abnormality of RBC           | Type 2 diabetes        | Lung Disease         | Abnormality Lung             |
| <i>MAPT</i>                 | <i>CATG0000033811.1</i> | Parkinson Disease             | Primary biliary cirrhosis | Alopecia                | Sickle Cell Trait        | Abnormality of RBC           | Type 2 diabetes        |                      |                              |
| <i>MAPT</i>                 | <i>CATG0000033813.1</i> | Parkinson Disease             | Primary biliary cirrhosis | Alopecia                | Sickle Cell Trait        | Abnormality of RBC           | Type 2 diabetes        |                      |                              |
| <i>SNCA</i>                 | <i>RP11-113D19.1</i>    | Parkinson Disease             |                           |                         |                          |                              |                        |                      |                              |
| <i>SNCA</i>                 | <i>RP11-113D19.1</i>    | Parkinson Disease             | Prion Disease             |                         |                          |                              |                        |                      |                              |
| <i>PRKN</i>                 | <i>CATG0000088181.1</i> | ND                            |                           |                         |                          |                              |                        |                      |                              |
| <i>PRKN</i>                 | <i>CATG0000088161.1</i> | ND                            |                           |                         |                          |                              |                        |                      |                              |
| <i>PRKN</i>                 | <i>CATG0000088141.1</i> | Inherited metabolic disorder  | Abnormality of metabolism | Auditory system disease | Hearing impairment       |                              |                        |                      |                              |
| <i>PRKN</i>                 | <i>CATG0000088131.1</i> | Atherosclerosis               |                           |                         |                          |                              |                        |                      |                              |
| <i>PINK1</i>                | <i>PINK1-AS</i>         | ND                            |                           |                         |                          |                              |                        |                      |                              |
| <i>LRKK2</i>                | <i>AC079630.4</i>       | Parkinson Disease             | Crohn's disease           | Asthma                  | Sclerosis upper limbs    | Glomerulosclerosis           | Multiple Sclerosis     | Arteriosclerosis     |                              |
| <i>SOD1</i>                 | <i>AP000234.8</i>       | ND                            |                           |                         |                          |                              |                        |                      |                              |
| <i>SOD1</i>                 | <i>AP000234.8</i>       | Esophageal Cancer             | Sickle Cell Anemia        |                         |                          |                              |                        |                      |                              |
| <i>FUS</i>                  | <i>CATG0000029076.1</i> | ND                            |                           |                         |                          |                              |                        |                      |                              |
| <i>FUS</i>                  | <i>RP11-388M20.6</i>    | Blood coagulation             | Atrial fibrillation       | Pulmonary embolism      | Abnormality of acid base | Pulmonary systemic sclerosis | IgA glomerulonephritis | Graves disease       | Systemic lupus erythematosus |
| <i>FUS</i>                  | <i>CATG0000029078.1</i> | Blood coagulation             | Atrial fibrillation       | Pulmonary embolism      | Abnormality of acid base | Pulmonary systemic sclerosis | IgA glomerulonephritis | Graves disease       | Systemic lupus erythematosus |
| <i>TARDP</i>                | <i>CATG0000046764.1</i> | ND                            |                           |                         |                          |                              |                        |                      |                              |
| <i>UBQLN2</i>               | <i>CATG00000113734</i>  | ND                            |                           |                         |                          |                              |                        |                      |                              |
| <i>HTT</i>                  | <i>HTT-AS</i>           | Abnormality of the myocardium |                           |                         |                          |                              |                        |                      |                              |

**Supplementary Table S2.** List of FANTOM CAT GWAS traits associated to antisense lncRNAs in *loci* associated to hereditary neurodegenerative diseases.

| Disease | Gene Name | AS lncRNA gene         | Ontology Name               | Ontology ID    | Fold Change | p-Value   |
|---------|-----------|------------------------|-----------------------------|----------------|-------------|-----------|
| AD      | APP       | AP000230.1             | nervous system              | UBERON:0001016 | 24.7        | 3.71E-38  |
|         |           |                        | brain                       | UBERON:0000955 | 24.2        | 5.20E-38  |
| AD      | APP       | CATG00000055739.1      | heart blood vessel          | UBERON:0003498 | 5.57        | 0.0111    |
|         |           |                        | smooth muscle cell (artery) | CL:0002592     | 7.62        | 0.0077    |
| AD      | PSEN1     | CATG00000021544.1      | immune system               | UBERON:0002405 | 5.05        | 9.65E-25  |
|         |           |                        | hematopoietic system        | UBERON:0002390 | 6.52        | 4.35E-36  |
|         |           |                        | hematopoietic cell          | CL:0000988     | 51.4        | 1.00E-31  |
| FTD     | C9orf72   | CATG00000105112.1      | hematopoietic system        | UBERON:0002390 | 12          | 5.65E-31  |
|         |           |                        | immune system               | UBERON:0002405 | 9.94        | 1.81E-18  |
|         |           |                        | leukocyte                   | CL:0000738     | 35.5        | 7.59E-50  |
|         |           |                        | hematopoietic cell          | CL:0000988     | 33.8        | 2.68E-46  |
| FTD     | MAPT      | MAPT-AS1               | nervous system              | UBERON:0001016 | 44.1        | 1.00E-44  |
|         |           |                        | brain                       | UBERON:0000955 | 32.7        | 6.73E-41  |
|         |           |                        | neuron                      | CL:0000540     | 5.07        | 1.11E-02  |
| FTD     | MAPT      | CATG00000033807.1      | ND                          | ND             | ND          | ND        |
| FTD     | MAPT      | CATG00000033811.1      | parietal lobe               | UBERON:0001872 | 8.76        | 0.0192    |
| FTD     | MAPT      | CATG00000033813.1      | nervous system              | UBERON:0001016 | 67.1        | 2.49E-23  |
|         |           |                        | brain                       | UBERON:0000955 | 34.7        | 4.33E-21  |
|         |           |                        | neuron                      | CL:0000540     | 15.7        | 0.00343   |
| PD      | SNCA      | RP11-67M1.1 (SNCA-AS1) | blood                       | UBERON:0000178 | 187         | 2.46E-07  |
|         |           |                        | reticulocyte                | CL:0000558     | 9.41        | 0.0171    |
| PD      | SNCA      | RP11-115D19.1          | placenta                    | UBERON:0001987 | 10.9        | 0.0016    |
|         |           |                        | mesothelial cells           | CL:0000077     | 19.7        | 0.00371   |
|         |           |                        | endothelial cells           | CL:0000066     | 5.22        | 2.85E-21  |
| PD      | PRKN      | CATG00000086818.1      | extra-ocular muscle         | UBERON:0001601 | 45.1        | 0.0113    |
|         |           |                        | medulla oblongata           | UBERON:0001896 | 35          | 0.000913  |
|         |           |                        | spinal cord                 | UBERON:0002240 | 10.1        | 0.0307    |
|         |           |                        | synovial cells              | CL:0000214     | 11.5        | 0.00471   |
| PD      | PRKN      | CATG00000086816.1      | ND                          | ND             | ND          | ND        |
| PD      | PRKN      | CATG00000086814.1      | pituitary gland             | UBERON:0000007 | 47          | 0.00312   |
| PD      | PRKN      | CATG00000086813.1      | adipose tissue              | UBERON:0001013 | 6.95        | 0.000506  |
|         |           |                        | spinal cord                 | UBERON:0002240 | 5.88        | 0.00889   |
|         |           |                        | fat cells                   | CL:0000136     | 15.1        | 0.0000153 |
| PD      | PINK1     | PINK1-AS               | ND                          | ND             | ND          | ND        |
| PD      | LRRK2     | AC079630.4             | hematopoietic system        | UBERON:0002390 | 5.92        | 2.92E-25  |
|         |           |                        | leukocyte                   | CL:0000738     | 9.02        | 1.09E-14  |
|         |           |                        | hematopoietic cell          | CL:0000988     | 8.52        | 4.71E-13  |
|         |           |                        | blood                       | UBERON:0000178 | 10.3        | 7.74E-07  |
| ALS     | SOD1      | AP000253.1             | testis                      | UBERON:0000473 | 15.5        | 0.0146    |
| ALS     | SOD1      | AP000254.8             | hepatocytes                 | CL:0000182     | 5.93        | 0.0168    |
| ALS     | FUS       | CATG00000029076.1      | testis                      | UBERON:0000473 | 12.2        | 0.0179    |
|         |           |                        | B cells                     | CL:0000236     | 10.9        | 8.91E-07  |
| ALS     | FUS       | RP11-388M20.6          | ND                          | ND             | ND          | ND        |
| ALS     | FUS       | CATG00000029078.1      | ND                          | ND             | ND          | ND        |
| ALS     | TARDBP    | CATG00000046764.1      | ND                          | ND             | ND          | ND        |
| ALS     | UBQLN2    | CATG00000113734        | pineal body                 | UBERON:0001905 | 12.4        | 0.0091    |
|         |           |                        | NK cells                    | CL:0000623     | 7.89        | 0.00422   |
| HD      | HTT       | HTT-AS                 | pineal body                 | UBERON:0001905 | 18.8        | 0.00429   |
|         |           |                        | nervous system              | UBERON:0001016 | 16.9        | 1.54E-16  |
|         |           |                        | brain                       | UBERON:0000955 | 15.2        | 7.76E-17  |

**Supplementary Table S3.** Sample Ontology Enrichment. List of the most enriched sample ontology categories (Ontology name, ontology ID) associated to FANTOM CAT antisense lncRNAs in the *loci* associated to hereditary neurodegenerative diseases analyzed in this study. Fold change and p-values indicate enrichment in the specific term versus all the other samples.

| Disease | Gene Symbol    | AS TSS          | Anatomy         | Reference                                   | FANTOM CAT classification |
|---------|----------------|-----------------|-----------------|---------------------------------------------|---------------------------|
| AD      | <i>APP</i>     | APP-bAS         | 5' head-to-head |                                             |                           |
| AD      | <i>APP</i>     | APP-5'AS        | 5' head-to-head | FANTOM CAT                                  | p_lncRNA_divergent        |
| AD      | <i>APP</i>     | APP-int1AS      | 5' head-to-head |                                             |                           |
| AD      | <i>APP</i>     | APP-int2AS      | intragenic      | FANTOM CAT                                  | others_short ncRNA        |
| AD      | <i>APP</i>     | APP-int3AS      | intragenic      | FANTOM CAT                                  | others_lncRNA_divergent   |
| AD      | <i>APP</i>     | APP-3'AS        | 3' tail-to-tail | FANTOM CAT                                  | others_short ncRNA        |
| AD      | <i>PSEN1</i>   | PSEN1-5'AS      | 5' head-to-head | FANTOM CAT                                  | p_lncRNA_divergent        |
| AD      | <i>PSEN1</i>   | PSEN1-bAS       | bidirectional   |                                             |                           |
| AD      | <i>PSEN1</i>   | PSEN1-intAS     | intragenic      | FANTOM CAT                                  | others_short ncRNA        |
| AD      | <i>PSEN2</i>   | PSEN2-5'AS      | 5' head-to-head |                                             |                           |
| AD      | <i>PSEN2</i>   | PSEN2-intAS     | intragenic      |                                             |                           |
| FTD     | <i>C9orf72</i> | C9orf72-AS3     | bidirectional   | FANTOM CAT; Rizzu P., et al., 2016          | p_lncRNA_divergent        |
| FTD     | <i>C9orf72</i> | C9orf72-AS2     | 5' head-to-head | Rizzu P., et al., 2016                      |                           |
| FTD     | <i>C9orf72</i> | C9orf72-AS1     | 5' head-to-head | Rizzu P., et al., 2016; Zu T., et al., 2013 |                           |
| FTD     | <i>C9orf72</i> | C9orf72-3'AS    | 3' tail-to-tail |                                             |                           |
| FTD     | <i>GRN</i>     | GRN-5'AS        | bidirectional   |                                             |                           |
| FTD     | <i>GRN</i>     | GRN-intAS       | 5' head-to-head |                                             |                           |
| FTD     | <i>MAPT</i>    | MAPT-AS1        | 5' head-to-head | FANTOM CAT                                  | p_lncRNA_divergent        |
| FTD     | <i>MAPT</i>    | MAPT-int1AS     | intragenic      | FANTOM CAT                                  | others_lncRNA_antisense   |
| FTD     | <i>MAPT</i>    | MAPT-int2AS     | intragenic      | FANTOM CAT                                  | others_lncRNA_antisense   |
| FTD     | <i>MAPT</i>    | MAPT-int3AS     | intragenic      | FANTOM CAT                                  | e_lncRNA_divergent        |
| FTD     | <i>MAPT</i>    | MAPT-3'AS       | 3' tail-to-tail |                                             |                           |
| PD      | <i>SNCA</i>    | SNCA-5'AS       | 5' head-to-head |                                             |                           |
| PD      | <i>SNCA</i>    | ENST00000501215 | 5' head-to-head | Annotated lncRNA (ENSEMBL)                  |                           |
| PD      | <i>SNCA</i>    | SNCA-int1AS     | 5' head-to-head | FANTOM CAT                                  | others_lncRNA_divergent   |
| PD      | <i>SNCA</i>    | SNCA-int2AS     | intragenic      | FANTOM CAT                                  | others_short ncRNA        |
| PD      | <i>SNCA</i>    | SNCA-3'AS1      | 3' tail-to-tail |                                             |                           |
| PD      | <i>SNCA</i>    | SNCA-3'AS2      | 3' tail-to-tail | FANTOM CAT                                  | e_lncRNA_intergenic       |
| PD      | <i>SNCA</i>    | ENST00000513572 | 3' tail-to-tail | Annotated lncRNA (ENSEMBL)                  |                           |
| PD      | <i>PRKN</i>    | PARCG           | 5' head-to-head | West A.B., et al., Jmol Biol, 2003          | mRNA_prot coding          |
| PD      | <i>PRKN</i>    | Parkin-int1AS   | intragenic      | FANTOM CAT                                  | e-lncRNA_antisense        |
| PD      | <i>PRKN</i>    | Parkin-int2AS   | intragenic      | FANTOM CAT                                  | others_lncRNA_antisense   |
| PD      | <i>PRKN</i>    | Parkin-int3AS   | intragenic      | FANTOM CAT                                  | others_lncRNA_antisense   |
| PD      | <i>PRKN</i>    | Parkin-int4AS   | intragenic      | FANTOM CAT                                  | e-lncRNA_antisense        |
| PD      | <i>PRKN</i>    | Parkin-int5AS   | intragenic      | FANTOM CAT                                  | others_uncertain_coding   |
| PD      | <i>PRKN</i>    | Parkin-3'AS1    | 3' tail-to-tail |                                             |                           |
| PD      | <i>PRKN</i>    | Parkin-3'AS2    | intergenic      | FANTOM CAT                                  | e-lncRNA_intergenic       |
| PD      | <i>PINK1</i>   | PINK1-5'AS      | 5' head-to-head |                                             |                           |
| PD      | <i>PINK1</i>   | PINK1-AS        | 3' tail-to-tail | Scheele C., et al., BMC Genomics, 2007      | others_lncRNA_antisense   |
| PD      | <i>PARK7</i>   | DJ1-5'AS        | bidirectional   |                                             |                           |
| PD      | <i>PARK7</i>   | DJ1-intAS       | 5' head-to-head |                                             |                           |
| PD      | <i>LRRK2</i>   | LRRK2-bAS       | bidirectional   |                                             |                           |
| PD      | <i>LRRK2</i>   | LRRK2-5'AS      | 5' head-to-head | FANTOM CAT                                  | p_lncRNA_divergent        |
| PD      | <i>LRRK2</i>   | LRRK2-int1AS    | 5' head-to-head |                                             |                           |
| PD      | <i>LRRK2</i>   | LRRK2-int2AS    | 5' head-to-head |                                             |                           |
| PD      | <i>VPS35</i>   | VPS35-AS        | intragenic      | FANTOM CAT                                  | others_short ncRNA        |
| ALS     | <i>SOD1</i>    | ENST00000449339 | bidirectional   | Annotated lncRNA                            |                           |
| ALS     | <i>SOD1</i>    | SOD1-5'AS       | 5' head-to-head | FANTOM CAT                                  | p_lncRNA_divergent        |
| ALS     | <i>SOD1</i>    | SOD1-int1AS     | intragenic      |                                             |                           |
| ALS     | <i>SOD1</i>    | SOD1-int2AS     | intragenic      | FANTOM CAT                                  | e_lncRNA_divergent        |
| ALS     | <i>FUS</i>     | FUS-5'AS        | 5' head-to-head | FANTOM CAT                                  | p_lncRNA_divergent        |
| ALS     | <i>FUS</i>     | FUS-int1AS      | intragenic      | FANTOM CAT                                  | e_lncRNA_divergent        |
| ALS     | <i>FUS</i>     | FUS-int2AS      | intragenic      | FANTOM CAT                                  | e_lncRNA_divergent        |
| ALS     | <i>TARDBP</i>  | TARDBP-AS       | 5' head-to-head | FANTOM CAT                                  | p_lncRNA_divergent        |
| ALS     | <i>UBQLN2</i>  | UBQLN2-bAS      | bidirectional   |                                             |                           |
| ALS     | <i>UBQLN2</i>  | UBQLN2-5'AS     | 5' head-to-head |                                             |                           |
| ALS     | <i>UBQLN2</i>  | UBQLN2-intAS    | intragenic      | FANTOM CAT                                  | p_lncRNA_divergent        |
| HD      | <i>HTT</i>     | HTT-AS          | 5' head-to-head | Chung D.W., et al., HMG, 2011               | p_lncRNA_divergent        |

**Supplementary Table S4.** List of natural antisense transcripts to neurodegeneration-associated genes identified in this study. Identified transcripts are listed in alphabetical order based on the disease and gene name (Gene Symbol), as discussed in the manuscript. AS TSS nomenclature and genomic anatomy are indicated. References to FANTOM CAT catalogue of human lncRNAs and classification of lncRNA functions are included. Reference to published work is shown, when available.
